# Supplementary material for: One out of Four: HspL but No Other Small Heat Shock Protein of Agrobacterium tumefaciens Acts as Efficient Virulence-Promoting VirB8 Chaperone
Source: PubMed Central journal article supplement (PMC3504140; doi:10.1371/journal.pone.0049685), 2012-11-21
Supplement: pone.0049685.s002.pdf [file pone.0049685.s002.pdf]

Table S1. Bacterial strains and plasmids

| Strains/plasmids             | Relevant characteristics                                                                                                                                                                                                                      | References/sources |
|------------------------------|-----------------------------------------------------------------------------------------------------------------------------------------------------------------------------------------------------------------------------------------------|--------------------|
| <b><i>A. tumefaciens</i></b> |                                                                                                                                                                                                                                               |                    |
| NT1RE(pJK270)                | Rm <sup>R</sup> , Em <sup>R</sup> , Km <sup>R</sup> /Nm <sup>R</sup> , <i>Agrobacterium tumefaciens</i> strain NT1RE containing pJK270, which is pTiC58Tra <sup>C</sup> with <i>Tn5</i> insertion in T-DNA region without affecting virulence | [1]                |
| NT1RE-Sp                     | Rm <sup>R</sup> , Em <sup>R</sup> , Sp <sup>R</sup> , NT1RE containing spectinomycin resistant gene ( <i>aadA</i> )                                                                                                                           | [2]                |
| $\Delta$ <i>hspL</i>         | Rm <sup>R</sup> , Em <sup>R</sup> , Km <sup>R</sup> /Nm <sup>R</sup> , <i>hspL</i> deletion mutant in NT1RE(pJK270)                                                                                                                           | [2]                |
| $\Delta$ <i>hspC</i>         | Rm <sup>R</sup> , Em <sup>R</sup> , Km <sup>R</sup> /Nm <sup>R</sup> , <i>hspC</i> deletion mutant in NT1RE(pJK270)                                                                                                                           | This study         |
| $\Delta$ <i>hspAT1</i>       | Rm <sup>R</sup> , Em <sup>R</sup> , Km <sup>R</sup> /Nm <sup>R</sup> , <i>hspAT1</i> deletion mutant in NT1RE(pJK270)                                                                                                                         | This study         |
| $\Delta$ <i>hspAT2</i>       | Rm <sup>R</sup> , Em <sup>R</sup> , Km <sup>R</sup> /Nm <sup>R</sup> , <i>hspAT2</i> deletion mutant in NT1RE(pJK270)                                                                                                                         | This study         |
| $\Delta$ <i>hspL, C</i>      | Rm <sup>R</sup> , Em <sup>R</sup> , Km <sup>R</sup> /Nm <sup>R</sup> , <i>hspL hspC</i> double-deletion mutant in NT1RE(pJK270)                                                                                                               | This study         |
| $\Delta$ <i>hspL, AT2</i>    | Rm <sup>R</sup> , Em <sup>R</sup> , Km <sup>R</sup> /Nm <sup>R</sup> , <i>hspL hspAT2</i> double-deletion mutant in NT1RE(pJK270)                                                                                                             | This study         |
| $\Delta$ <i>hspC, AT2</i>    | Rm <sup>R</sup> , Em <sup>R</sup> , Km <sup>R</sup> /Nm <sup>R</sup> , <i>hspC hspAT2</i> double-deletion mutant in NT1RE(pJK270)                                                                                                             | This study         |
| $\Delta$ <i>hspL, C, AT2</i> | Rm <sup>R</sup> , Em <sup>R</sup> , Km <sup>R</sup> /Nm <sup>R</sup> , <i>hspL hspC hspAT2</i> triple-deletion mutant in NT1RE(pJK270)                                                                                                        | This study         |
| $\Delta$ 4 <i>sHsps</i>      | Rm <sup>R</sup> , Em <sup>R</sup> , Km <sup>R</sup> /Nm <sup>R</sup> , <i>hspL hspC hspAT1 hspAT2</i> quadruple-deletion mutant in NT1RE(pJK270)                                                                                              | This study         |
| <b><i>E. coli</i></b>        |                                                                                                                                                                                                                                               |                    |
| DH10B                        | Host for DNA cloning                                                                                                                                                                                                                          | Invitrogen         |
| BL21(DE3)                    | Host for overexpressing proteins driven by T7 promoter                                                                                                                                                                                        | [3]                |
| <b>Plamid</b>                |                                                                                                                                                                                                                                               |                    |
| pJQHspC                      | Gm <sup>R</sup> , for <i>hspC</i> deletion construct                                                                                                                                                                                          | This study         |
| pJQHspAT1                    | Gm <sup>R</sup> , for <i>hspAT1</i> deletion construct                                                                                                                                                                                        | This study         |
| pJQHspAT2                    | Gm <sup>R</sup> , for <i>hspAT2</i> deletion construct                                                                                                                                                                                        | This study         |
| pETHspL                      | Ap <sup>R</sup> , overexpression of HspL-His in <i>E. coli</i>                                                                                                                                                                                | [2]                |
| pETHspC                      | Ap <sup>R</sup> , overexpression of HspC-His in <i>E. coli</i>                                                                                                                                                                                | This study         |

|                                     |                                                                                                              |            |
|-------------------------------------|--------------------------------------------------------------------------------------------------------------|------------|
| pETHspAT1                           | Ap <sup>R</sup> , overexpression of HspAT1-His in <i>E. coli</i>                                             | This study |
| pETHspAT2                           | Ap <sup>R</sup> , overexpression of HspAT2-His in <i>E. coli</i>                                             | This study |
| pETGSTB8                            | Km <sup>R</sup> , overexpression of GST-VirB8 in <i>E. coli</i>                                              | [4]        |
| pET <sub>N</sub> AT2-HspL           | Ap <sup>R</sup> , overexpression of <sub>N</sub> AT2-HspL-His chimeric protein, in <i>E. coli</i>            | This study |
| pETHspL-AT2 <sub>C</sub>            | Ap <sup>R</sup> , overexpression of HspL-AT2 <sub>C</sub> -His chimeric protein, in <i>E. coli</i>           | This study |
| pET <sub>NC</sub> HspL-AT2 $\alpha$ | Ap <sup>R</sup> , overexpression of <sub>NC</sub> HspL-AT2 $\alpha$ -His chimeric protein, in <i>E. coli</i> | This study |
| pN-HspL-HA                          | Sp <sup>R</sup> , expression of HspL-HA by native promoter                                                   | This study |
| pN-HspC-HA                          | Sp <sup>R</sup> , expression of HspC-HA by native promoter                                                   | This study |
| pN-HspAT1-HA                        | Sp <sup>R</sup> , expression of HspAT1-HA by native promoter                                                 | This study |
| pN-HspAT2-HA                        | Sp <sup>R</sup> , expression of HspAT2-HA by native promoter                                                 | This study |
| pTrc200                             | Sp <sup>R</sup> , pVS1 origin <i>lacIq</i> , <i>tac</i> promoter expression vector                           | [5]        |
| pTrc200HA                           | Sp <sup>R</sup> , HA sequence inserted between <i>PstI</i> and <i>HindIII</i> site of pTrc200                | [6]        |
| pTrcHspL-His                        | Sp <sup>R</sup> , expression of HspL-His by <i>tac</i> promoter                                              | This study |
| pTrcHspC-His                        | Sp <sup>R</sup> , expression of HspC-His by <i>tac</i> promoter                                              | This study |
| pTrcHspAT1-His                      | Sp <sup>R</sup> , expression of HspAT1-His by <i>tac</i> promoter                                            | This study |
| pTrcHspAT2-His                      | Sp <sup>R</sup> , expression of HspAT2-His by <i>tac</i> promoter                                            | This study |

## REFERENCES

1. Kao JC, Perry KL, Kado CI (1982) Indoleacetic acid complementation and its relation to host range specifying genes on the Ti plasmid of *Agrobacterium tumefaciens*. *Mol Gen Genet* 188: 425-432.
2. Tsai YL, Wang MH, Gao C, Klusener S, Baron C, et al. (2009) Small heat-shock protein HspL is induced by VirB protein(s) and promotes VirB/D4-mediated DNA transfer in *Agrobacterium tumefaciens*. *Microbiology* 155: 3270-3280.
3. Studier FW, Rosenberg AH, Dunn JJ, Dubendorff JW (1990) Use of T7 RNA polymerase to direct expression of cloned genes. *Methods Enzymol* 185: 60-89.
4. Tsai YL, Chiang YR, Narberhaus F, Baron C, Lai EM (2010) The small heat-shock protein HspL is a VirB8 chaperone promoting type IV secretion-mediated DNA transfer. *J Biol Chem* 285: 19757-19766.
5. Schmidt-Eisenlohr H, Domke N, Baron C (1999) TraC of IncN plasmid pKM101 associates with membranes and extracellular high-molecular-weight structures in *Escherichia coli*. *Journal of Bacteriology* 181: 5563-5571.
6. Ma LS, Narberhaus F, Lai EM (2012) IcmF family protein TssM exhibits ATPase activity and energizes type VI secretion. *J Biol Chem* 287: 15610-15621.
