# Supplementary material for: One out of Four: HspL but No Other Small Heat Shock Protein of Agrobacterium tumefaciens Acts as Efficient Virulence-Promoting VirB8 Chaperone
Source: PubMed Central journal article supplement (PMC3504140; doi:10.1371/journal.pone.0049685), 2012-11-21
Supplement: pone.0049685.s003.pdf [file pone.0049685.s003.pdf]

Table S2. Primer information

| Name and size of PCR product                           | Primers                   | Sequence <sup>a</sup>                  |
|--------------------------------------------------------|---------------------------|----------------------------------------|
| <i>hspC</i> for pET22b(+)                              | <i>hspC</i> -F-EN         | 5'-GAATTCCATATGAGCCGCATGACGCCATT-3'    |
|                                                        | <i>hspC</i> -R-XhoI       | 5'-CTCGAGCTCTGAGACGGAAATAT-3'          |
| <i>hspAT1</i> for pET22b(+)                            | <i>hspAT1</i> -F-EN       | 5'-GAATTCCATATGGCAACATCTTACGACTA-3'    |
|                                                        | <i>hspAT1</i> -R-XhoI     | 5'-CTCGAGAGCGGCCTTCTGCGCTT-3'          |
| <i>hspAT2</i> for pET22b(+)                            | <i>hspAT2</i> -F-EN       | 5'-GAATTCCATATGGCTATGGCAACATCCTA-3'    |
|                                                        | <i>hspAT2</i> -R-XhoI     | 5'-CTCGAGTGCAGCCTTCTTTTCTT-3'          |
| <i>hspL-alpha-C</i> for chimeric construct             | L-K-alpha-F               | 5'-CCCTATGACATCGAACGAACAGGTGA-3'       |
|                                                        | <i>hspL</i> -XhoI-R       | 5'-CTCGAGGTTGACCTGAGCCGGG-3'           |
| <i>hspL-N-alpha</i> for chimeric construct             | <i>hspL</i> -NdeI-F       | 5'-CATATGCGTCACGTTGATTTTCCC-3'         |
|                                                        | L-K-alpha-R               | 5'-TCTTCCGGAACCTCGCGGACGAGGTGC-3'      |
| <i>hspAT2-N</i> for chimeric construct                 | <i>hspAT2</i> -F-EN       | 5'-GAATTCCATATGGCTATGGCAACATCCTA-3'    |
|                                                        | AT2-NK-R                  | 5'-TCACCTGTTTCGTTTCGATGTCATAGGG-3'     |
| <i>hspAT2-alpha</i> for chimeric construct             | AT2-K-alpha-F             | 5'-CCCTATAATATCATCAAGACCGGCGA-3'       |
|                                                        | AT2-K-alpha-R             | 5'-GCTTCCGGAATATTGCGAACGAGAT-3'        |
| <i>hspAT2-C</i> for chimeric construct                 | AT2-CK-F                  | 5'-CGACCTCGTCCGCGAGGTTCCGGAAGA-3'      |
|                                                        | <i>hspAT2</i> -R-XhoI     | 5'-CTCGAGTGCAGCCTTCTTTTCTT-3'          |
| <i>hspL</i> promoter + <i>hspL</i> (no stop codon)     | Compl- <i>hspL</i> -FP    | 5'-GGATCCAAGCTTTGTCTTCACTGGCGCAAT-3'   |
|                                                        | Compl- <i>hspL</i> -RP    | 5'-CTGCAGGTTGACCTGAGCCGGGGTA-3'        |
| <i>hspC</i> promoter + <i>hspC</i> (no stop code)      | Compl- <i>hspC</i> -FP    | 5'-GGATCCAAGCTTAGGACTTCCAAAGGCGAGCA-3' |
|                                                        | Compl- <i>hspC</i> -RP    | 5'-CTGCAGCTCTGAGACGGAAATATTAAT-3'      |
| <i>hspAT1</i> promoter + <i>hspAT1</i> (no stop codon) | Compl- <i>hspAT1</i> -FP  | 5'-GGATCCAAGCTTAGAAGACGCTCGACACGTTG-3' |
|                                                        | Compl- <i>hspAT1</i> -RP3 | 5'-CGCCTGCAGAGCGGCCTTCTGCGCTTC-3'      |
| <i>hspAT2</i> promoter + <i>hspAT2</i> (no stop codon) | Compl- <i>hspAT2</i> -FP  | 5'-GGATCCAAGCTTCTTCGAGCGGAAGAAGAAG-3'  |
|                                                        | Compl- <i>hspAT2</i> -RP  | 5'-CTGCAGTGCAGCCTTCTTTTCTTCGAT-3'      |
|                                                        | <i>His-PstI</i> -R        | 5'-CTGCAGTTATCAGTGGTGGTGGTGGTGGTGGT-3' |
| For <i>hspC</i> deletion construct                     | <i>hspC</i> -FP1-1        | 5'-TCTAGAATTCCAGCATTTCGG-3'            |
|                                                        | <i>hspC</i> -RP1-1        | 5'-GGATCCCGCTTCCGGCAACCT-3'            |
|                                                        | <i>hspC</i> -FP2-1        | 5'-GGATCCATGAACGCTGGAATC-3'            |
|                                                        | <i>hspC</i> -RP2-1        | 5'-ACTAGTGGCGGCTTGGAATG-3'             |
| For <i>hspAT1</i> deletion construct                   | <i>hspAT1</i> -FP1        | 5'-TCTAGACCGAGCTGTCCGTCCGCCGA-3'       |
|                                                        | <i>hspAT1</i> -RP1        | 5'-GGATCCAGCCCCGTGTCAGCGGCT-3'         |
|                                                        | <i>hspAT1</i> -FP2        | 5'-GGATCCGGGTTGGGAAGGAGAGTATC-3'       |
|                                                        | <i>hspAT1</i> -RP2        | 5'-CTGCAGCCTGAAGCTCATCGATGGA-3'        |

|                                      |              |                                          |
|--------------------------------------|--------------|------------------------------------------|
| For <i>hspAT2</i> deletion construct | hspAT2-FP1-1 | 5'- <b>TCTAGACCCACCTTGGTCGCGATG</b> -3'  |
|                                      | hspAT2-RP1-2 | 5'- <b>GGATCCTTGAAGCAACATGGGTAC</b> -3'  |
|                                      | hspAT2-FP2-3 | 5'- <b>AGATCTGCGACGCCCGTCAACATTG</b> -3' |
|                                      | hspAT2-RP2   | 5'- <b>ACTAGTCGTGTAAGTCTCGCGCCA</b> -3'  |

---

<sup>a</sup>The sequences of designed restriction enzyme sites were shown in bold and the sequences complementary to specific region in *A. tumefaciens* genome is shown in Italian
